# Supplementary material
Source: PubMed Central journal article supplement (PMC5944295)
Supplement: NIHMS960304-supplement-T1.pdf [file NIHMS960304-supplement-T1.pdf]

Suppl. Table 1. All *HIF2A* and *HIF1A* gene variants identified in this study

| Gene  | Exon | Nucleotide             | Protein | Type     | SNPdb ID     | Number of events* | Het** |
|-------|------|------------------------|---------|----------|--------------|-------------------|-------|
| HIF2A | 2    | c.41G>A                | p.R14K  | missense | rs73926269   | 2                 | 2     |
| HIF2A | 2    | c.212C>A               | p.S71Y  | missense | Unreported   | 1                 | 1     |
| HIF2A | 3    | c.218-9C>T             |         | intronic | rs75984373   |                   |       |
| HIF2A | 3    | c.218-7insT            |         | intronic | rs66811540   |                   |       |
| HIF2A | 3    | c.218-11C>A_T          |         | intronic | rs202210836  |                   |       |
| HIF2A | 3    | c.218-10-11insCT       |         | intronic | rs142684263  |                   |       |
| HIF2A | 3    | c.218-13C>G            |         | intronic | rs200435589  |                   |       |
| HIF2A | 3    | c.218-11C>G            |         | intronic | rs202210336* |                   |       |
| HIF2A | 3    | c.218-55C>A            |         | intronic | rs6743991    | 199               | 95    |
| HIF2A | 6    | c.779+8G>T             |         | intronic | Unreported   | 1                 | 1     |
| HIF2A | 8    | c.993C>T               | p.N331N | silent   | Unreported   | 1                 | 1     |
| HIF2A | 9    | c.1035-7C>G            |         | intronic | rs7557402    | 265               | 111   |
| HIF2A | 9    | c.1249+38C>T           |         | intronic | rs77794056   | 7                 | 7     |
| HIF2A | 9    | c.1113C>T              | p.N371N | silent   | rs149518347  | 2                 | 2     |
| HIF2A | 10   | c.1443+51C>T           |         | intronic | rs181412376  | 1                 | 1     |
| HIF2A | 10   | c.1443+61A>G           |         | intronic | rs17035085   | 28                | 28    |
| HIF2A | 10   | c.1350G>C              | p.E450D | missense | Unreported   | 1                 | 1     |
| HIF2A | 10   | c.1281T>C              | p.Y427Y | silent   | Unreported   | 1                 | 1     |
| HIF2A | 11   | c.1554+48G>C           |         | intronic | rs7598371    | 230               | 134   |
| HIF2A | 11   | c.1444-137A>G          |         | intronic | rs7571218    | 301               | 49    |
| HIF2A | 12   | c.1591C>T              | p.P531S | missense | Favier et al | 1                 | 1     |
| HIF2A | 12   | c.1592C>T              | p.P531L | missense | Unreported   | 1                 | 1     |
| HIF2A | 12   | c.1591C>A              | p.P531T | missense | Unreported   | 1                 | 1     |
| HIF2A | 12   | c.1908T>C              | p.N636N | silent   | rs35606117   | 9                 | 9     |
| HIF2A | 12   | c.1737G>A              | p.P579P | silent   | rs184760160  | 1                 | 1     |
| HIF2A | 12   | c.1833C>T              | p.A611A | silent   | rs41281469   | 1                 | 1     |
| HIF2A | 15   | c.2288-26G>A           |         | intronic | rs17035089   | 8                 | 8     |
| HIF2A | 15   | c.2353C>A              | p.P785T | missense | rs61518065   | 10                | 8     |
| HIF2A | 15   | c.2296A>C              | p.T766P | missense | rs59901247   | 19                | 13    |
| HIF2A | 15   | c.2461+27C>G           |         | intronic | Unreported   | 3                 | 3     |
| HIF2A | 15   | c.2461+41G>A           |         | intronic | Unreported   | 7                 | 7     |
| HIF2A | 15   | c.2403A>C              | p.P801P | silent   | Unreported   | 1                 | 1     |
| HIF2A | 15   | c.2511C>T              | p.P837P | silent   | rs35795449   | 5                 | 5     |
| HIF2A | 16   | c.2613+31C>A           |         | intronic | Unreported   | 1                 | 1     |
| HIF1A | 9    | c.1744C>T              | p.P582S | missense | rs11549465   | 32                | 30    |
| HIF1A | 9    | c.1762G>A              | p.A588T | missense | rs11549467   | 2                 | 2     |
| HIF1A | 12   | c.1800A>T              | p.T600T | silent   | rs61755645   | 2                 | 2     |
| HIF1A | 12   | c.2093+30_2093+31delTC |         | intronic | rs72248236   | 2                 | 1     |
| HIF1A | 12   | c.2093+57T>C           |         | intronic | rs192696339  | 1                 | 1     |
| HIF1A | 12   | c.2093+99T>C           |         | intronic | rs4902080    | 123               | 14    |

Het=heterozygosity; m=nonsynonymous missense mutation; s=synonymous missense mutation; i=intronic; \*counted by allele (total n=478 for HIF2A and n=258 for HIF1A); \*\*same position as rs202210336, but distinct nucleotide change. Variants highlighted in yellow were predicted to be pathogenic by SIFT or Polyphen 2 algorithms and were further evaluated.
